# Supplementary material for: Expression Status and Prognostic Value of m6A RNA Methylation Regulators in Lung Adenocarcinoma
Source: MDPI journal article supplement (doi:10.3390/life11070619), 2021-06-26
Supplement: s1 [file s1]

Table S1. 479 LUAD Patients information

| id           | survival time (month) | survival status |
|--------------|-----------------------|-----------------|
| TCGA-L4-A4E5 | 19.27                 | 0               |
| TCGA-50-6673 | 0.73                  | 1               |
| TCGA-35-4123 | 6.07                  | 0               |
| TCGA-86-8076 | 16.30                 | 0               |
| TCGA-NJ-A4YF | 72.03                 | 0               |
| TCGA-55-6980 | 70.30                 | 0               |
| TCGA-83-5908 | 27.47                 | 0               |
| TCGA-44-3918 | 6.57                  | 0               |
| TCGA-50-7109 | 10.27                 | 1               |
| TCGA-64-1681 | 38.90                 | 1               |
| TCGA-44-6145 | 10.93                 | 0               |
| TCGA-MP-A4TJ | 11.30                 | 1               |
| TCGA-44-2655 | 19.17                 | 0               |
| TCGA-73-4662 | 30.40                 | 0               |
| TCGA-44-2664 | 12.77                 | 0               |
| TCGA-L4-A4E6 | 14.50                 | 0               |
| TCGA-50-5942 | 29.43                 | 0               |
| TCGA-35-4122 | 7.50                  | 0               |
| TCGA-44-2661 | 14.87                 | 0               |
| TCGA-50-5944 | 25.47                 | 0               |
| TCGA-67-3770 | 20.33                 | 0               |
| TCGA-05-4389 | 45.63                 | 0               |
| TCGA-44-3919 | 6.33                  | 0               |
| TCGA-MP-A4T2 | 37.87                 | 1               |
| TCGA-38-7271 | 26.67                 | 1               |
| TCGA-49-4487 | 28.50                 | 1               |
| TCGA-49-4486 | 77.27                 | 1               |
| TCGA-44-A47G | 11.70                 | 0               |
| TCGA-55-1595 | 49.30                 | 0               |
| TCGA-MP-A4TA | 31.67                 | 1               |
| TCGA-78-7162 | 105.63                | 1               |
| TCGA-67-3771 | 20.33                 | 0               |
| TCGA-55-6987 | 71.23                 | 0               |
| TCGA-78-8655 | 78.67                 | 0               |
| TCGA-49-4514 | 56.67                 | 0               |
| TCGA-91-6835 | 2.63                  | 0               |
| TCGA-50-5935 | 21.77                 | 1               |
| TCGA-97-A4M6 | 18.93                 | 0               |
| TCGA-99-8028 | 37.27                 | 0               |
| TCGA-97-A4M1 | 20.03                 | 0               |
| TCGA-55-8089 | 23.40                 | 1               |
| TCGA-67-6216 | 4.70                  | 0               |

---

|              |       |   |
|--------------|-------|---|
| TCGA-44-6144 | 13.57 | 0 |
| TCGA-64-1676 | 57.60 | 0 |
| TCGA-99-8032 | 1.47  | 0 |
| TCGA-MN-A4N5 | 2.80  | 0 |
| TCGA-50-8457 | 25.97 | 0 |
| TCGA-97-A4M2 | 20.80 | 0 |
| TCGA-95-7947 | 1.33  | 0 |
| TCGA-91-6828 | 10.77 | 0 |
| TCGA-MP-A4TH | 14.87 | 0 |
| TCGA-99-AA5R | 21.93 | 0 |
| TCGA-95-7944 | 0.70  | 0 |
| TCGA-69-8255 | 4.30  | 0 |
| TCGA-97-8179 | 14.50 | 0 |
| TCGA-50-8460 | 27.63 | 0 |
| TCGA-86-A456 | 13.50 | 0 |
| TCGA-55-8090 | 19.93 | 1 |
| TCGA-69-7980 | 13.70 | 0 |
| TCGA-4B-A93V | 8.47  | 0 |
| TCGA-44-7672 | 13.93 | 0 |
| TCGA-55-8206 | 29.60 | 0 |
| TCGA-MN-A4N4 | 39.17 | 0 |
| TCGA-73-7498 | 39.63 | 0 |
| TCGA-91-6840 | 12.40 | 0 |
| TCGA-44-6148 | 12.07 | 0 |
| TCGA-86-8668 | 14.10 | 0 |
| TCGA-55-8085 | 30.13 | 0 |
| TCGA-86-8669 | 31.27 | 0 |
| TCGA-S2-AA1A | 17.10 | 0 |
| TCGA-97-A4M3 | 18.00 | 0 |
| TCGA-55-8203 | 18.23 | 0 |
| TCGA-86-7953 | 19.70 | 0 |
| TCGA-69-7763 | 23.00 | 0 |
| TCGA-NJ-A4YQ | 29.53 | 0 |
| TCGA-55-7281 | 29.07 | 0 |
| TCGA-44-A4SS | 13.83 | 0 |
| TCGA-55-8208 | 22.47 | 0 |
| TCGA-55-7995 | 29.63 | 0 |
| TCGA-97-A4M7 | 20.97 | 0 |
| TCGA-69-7764 | 13.80 | 0 |
| TCGA-44-3398 | 8.43  | 0 |
| TCGA-55-A57B | 18.20 | 0 |
| TCGA-97-A4M5 | 21.13 | 0 |
| TCGA-55-1592 | 23.37 | 1 |
| TCGA-50-5049 | 71.53 | 0 |

---

---

|              |        |   |
|--------------|--------|---|
| TCGA-44-3917 | 13.07  | 0 |
| TCGA-05-4420 | 30.40  | 0 |
| TCGA-44-2666 | 3.23   | 1 |
| TCGA-78-7535 | 31.63  | 1 |
| TCGA-71-6725 | 8.53   | 0 |
| TCGA-44-2668 | 8.20   | 0 |
| TCGA-05-4417 | 15.17  | 0 |
| TCGA-55-6969 | 41.30  | 0 |
| TCGA-78-8662 | 112.03 | 1 |
| TCGA-62-A46R | 57.50  | 1 |
| TCGA-64-5781 | 40.07  | 0 |
| TCGA-78-7542 | 10.70  | 1 |
| TCGA-35-3615 | 0.47   | 0 |
| TCGA-05-4390 | 37.53  | 0 |
| TCGA-44-2656 | 19.40  | 0 |
| TCGA-05-4430 | 25.37  | 0 |
| TCGA-64-5778 | 30.87  | 0 |
| TCGA-64-5774 | 85.00  | 0 |
| TCGA-78-7163 | 227.07 | 0 |
| TCGA-71-8520 | 7.00   | 1 |
| TCGA-86-8673 | 15.17  | 0 |
| TCGA-78-7143 | 165.37 | 1 |
| TCGA-44-2662 | 16.00  | 0 |
| TCGA-78-7153 | 25.33  | 0 |
| TCGA-78-7152 | 40.07  | 0 |
| TCGA-NJ-A4YG | 63.47  | 0 |
| TCGA-62-A46P | 19.80  | 1 |
| TCGA-62-A46O | 48.47  | 1 |
| TCGA-86-8075 | 15.97  | 0 |
| TCGA-78-7540 | 29.37  | 0 |
| TCGA-78-7633 | 33.13  | 0 |
| TCGA-05-4249 | 50.77  | 0 |
| TCGA-49-4501 | 47.37  | 1 |
| TCGA-MP-A4SV | 87.33  | 1 |
| TCGA-05-4422 | 12.17  | 0 |
| TCGA-86-7954 | 20.17  | 0 |
| TCGA-05-4382 | 20.23  | 0 |
| TCGA-78-7155 | 39.03  | 1 |
| TCGA-05-4426 | 26.37  | 0 |
| TCGA-50-6592 | 25.90  | 1 |
| TCGA-50-5066 | 31.47  | 0 |
| TCGA-38-4631 | 11.80  | 1 |
| TCGA-50-6590 | 42.93  | 1 |
| TCGA-78-7537 | 54.07  | 1 |

---

---

|              |        |   |
|--------------|--------|---|
| TCGA-55-6972 | 54.40  | 1 |
| TCGA-67-3774 | 12.83  | 0 |
| TCGA-62-A46S | 55.10  | 1 |
| TCGA-05-4405 | 20.33  | 0 |
| TCGA-55-6986 | 108.70 | 0 |
| TCGA-50-5931 | 14.47  | 1 |
| TCGA-38-4630 | 35.77  | 1 |
| TCGA-NJ-A55A | 0.27   | 0 |
| TCGA-05-4403 | 19.27  | 0 |
| TCGA-MP-A5C7 | 62.07  | 0 |
| TCGA-62-A46V | 73.30  | 0 |
| TCGA-50-6597 | 42.27  | 1 |
| TCGA-73-4658 | 53.33  | 1 |
| TCGA-67-3772 | 19.10  | 0 |
| TCGA-05-4433 | 24.33  | 0 |
| TCGA-67-3773 | 14.23  | 0 |
| TCGA-62-A470 | 39.80  | 1 |
| TCGA-50-5939 | 15.33  | 1 |
| TCGA-95-7948 | 4.43   | 0 |
| TCGA-69-7973 | 7.67   | 0 |
| TCGA-86-8358 | 21.77  | 0 |
| TCGA-NJ-A4YP | 1.67   | 0 |
| TCGA-67-6215 | 5.80   | 0 |
| TCGA-55-A493 | 0.93   | 0 |
| TCGA-44-8117 | 12.83  | 0 |
| TCGA-55-7576 | 22.33  | 0 |
| TCGA-97-8175 | 18.37  | 0 |
| TCGA-86-8585 | 11.77  | 0 |
| TCGA-55-8616 | 1.60   | 0 |
| TCGA-44-8120 | 8.67   | 0 |
| TCGA-86-8073 | 24.67  | 0 |
| TCGA-97-8177 | 16.63  | 0 |
| TCGA-44-4112 | 12.33  | 0 |
| TCGA-97-A4M0 | 21.73  | 0 |
| TCGA-86-7955 | 16.93  | 0 |
| TCGA-86-A4P7 | 13.83  | 0 |
| TCGA-44-7671 | 17.83  | 0 |
| TCGA-55-7574 | 33.17  | 1 |
| TCGA-38-4625 | 99.10  | 0 |
| TCGA-05-5715 | 2.07   | 0 |
| TCGA-44-7661 | 12.20  | 0 |
| TCGA-97-8172 | 18.17  | 0 |
| TCGA-44-A47B | 9.57   | 0 |
| TCGA-38-A44F | 4.43   | 0 |

---

---

|              |       |   |
|--------------|-------|---|
| TCGA-97-A4LX | 20.47 | 0 |
| TCGA-73-7499 | 23.83 | 0 |
| TCGA-86-A4D0 | 3.87  | 1 |
| TCGA-55-7910 | 34.67 | 0 |
| TCGA-86-8280 | 23.37 | 0 |
| TCGA-MP-A4TF | 11.20 | 1 |
| TCGA-97-8174 | 5.47  | 1 |
| TCGA-55-A48Y | 21.00 | 0 |
| TCGA-86-7713 | 14.07 | 0 |
| TCGA-78-7539 | 10.90 | 0 |
| TCGA-55-8205 | 19.97 | 0 |
| TCGA-73-A9RS | 11.33 | 1 |
| TCGA-86-A4JF | 17.87 | 0 |
| TCGA-78-8648 | 40.30 | 1 |
| TCGA-86-8672 | 0.63  | 1 |
| TCGA-69-A59K | 19.70 | 0 |
| TCGA-44-6146 | 10.07 | 0 |
| TCGA-50-8459 | 19.63 | 0 |
| TCGA-38-4629 | 28.80 | 1 |
| TCGA-78-7161 | 7.17  | 0 |
| TCGA-62-A472 | 30.33 | 0 |
| TCGA-05-4424 | 30.43 | 0 |
| TCGA-62-8397 | 42.97 | 0 |
| TCGA-69-7760 | 6.73  | 0 |
| TCGA-44-8119 | 9.50  | 0 |
| TCGA-62-8395 | 40.53 | 0 |
| TCGA-86-8056 | 4.63  | 0 |
| TCGA-64-5775 | 2.07  | 1 |
| TCGA-99-7458 | 13.07 | 0 |
| TCGA-53-7813 | 14.13 | 0 |
| TCGA-78-7149 | 36.43 | 0 |
| TCGA-73-4666 | 26.67 | 0 |
| TCGA-55-6968 | 43.10 | 1 |
| TCGA-53-7624 | 34.77 | 1 |
| TCGA-50-6591 | 3.97  | 1 |
| TCGA-86-7701 | 15.80 | 0 |
| TCGA-73-4670 | 4.37  | 0 |
| TCGA-05-4425 | 22.30 | 0 |
| TCGA-MP-A4T7 | 5.57  | 1 |
| TCGA-78-7167 | 89.37 | 1 |
| TCGA-93-A4JN | 23.93 | 0 |
| TCGA-55-8094 | 18.03 | 0 |
| TCGA-49-AARE | 40.97 | 1 |
| TCGA-49-AARN | 37.83 | 1 |

---

---

|              |        |   |
|--------------|--------|---|
| TCGA-49-AAR0 | 155.17 | 0 |
| TCGA-97-7553 | 62.33  | 0 |
| TCGA-44-6778 | 37.00  | 0 |
| TCGA-44-6776 | 64.60  | 0 |
| TCGA-50-5946 | 22.87  | 0 |
| TCGA-49-AARR | 166.40 | 0 |
| TCGA-95-8039 | 0.90   | 0 |
| TCGA-49-4488 | 28.97  | 1 |
| TCGA-O1-A52J | 59.93  | 1 |
| TCGA-97-7546 | 42.83  | 0 |
| TCGA-97-8552 | 20.87  | 0 |
| TCGA-49-AARO | 125.30 | 0 |
| TCGA-55-8507 | 13.93  | 0 |
| TCGA-L9-A444 | 10.23  | 0 |
| TCGA-55-8097 | 15.87  | 0 |
| TCGA-55-7570 | 27.47  | 0 |
| TCGA-J2-A4AD | 18.33  | 1 |
| TCGA-95-7043 | 0.07   | 0 |
| TCGA-L9-A443 | 6.43   | 1 |
| TCGA-44-A4SU | 13.63  | 1 |
| TCGA-55-7725 | 14.73  | 0 |
| TCGA-55-7911 | 17.90  | 0 |
| TCGA-55-A492 | 19.87  | 0 |
| TCGA-93-A4JO | 1.10   | 1 |
| TCGA-93-7348 | 4.23   | 0 |
| TCGA-55-8621 | 17.17  | 0 |
| TCGA-91-8497 | 14.47  | 1 |
| TCGA-93-7347 | 9.90   | 0 |
| TCGA-97-7938 | 0.60   | 1 |
| TCGA-J2-A4AE | 22.37  | 0 |
| TCGA-93-A4JQ | 17.53  | 0 |
| TCGA-55-6543 | 14.50  | 0 |
| TCGA-55-8299 | 15.63  | 1 |
| TCGA-55-7913 | 18.70  | 1 |
| TCGA-55-7903 | 18.90  | 0 |
| TCGA-J2-A4AG | 16.67  | 0 |
| TCGA-NJ-A55R | 20.10  | 0 |
| TCGA-44-7659 | 14.80  | 0 |
| TCGA-55-A4DG | 20.27  | 0 |
| TCGA-97-7941 | 16.13  | 0 |
| TCGA-55-7573 | 16.23  | 0 |
| TCGA-55-7726 | 21.73  | 0 |
| TCGA-91-8499 | 1.20   | 0 |
| TCGA-55-A491 | 20.87  | 0 |

---

---

|              |        |   |
|--------------|--------|---|
| TCGA-55-A4DF | 14.67  | 1 |
| TCGA-49-AARQ | 224.40 | 0 |
| TCGA-91-6836 | 13.90  | 0 |
| TCGA-55-8302 | 15.93  | 0 |
| TCGA-55-6985 | 41.10  | 0 |
| TCGA-55-6971 | 46.67  | 0 |
| TCGA-91-6847 | 28.07  | 0 |
| TCGA-55-6642 | 81.63  | 0 |
| TCGA-49-AAR2 | 74.13  | 0 |
| TCGA-91-6831 | 10.33  | 0 |
| TCGA-97-7547 | 65.50  | 0 |
| TCGA-97-7552 | 64.40  | 0 |
| TCGA-44-7660 | 10.83  | 0 |
| TCGA-44-A479 | 13.07  | 0 |
| TCGA-55-8091 | 20.00  | 0 |
| TCGA-91-6829 | 41.93  | 1 |
| TCGA-55-8510 | 17.97  | 0 |
| TCGA-55-8301 | 17.80  | 0 |
| TCGA-55-8087 | 15.40  | 0 |
| TCGA-44-7662 | 7.27   | 0 |
| TCGA-55-A494 | 16.03  | 0 |
| TCGA-L9-A8F4 | 15.87  | 0 |
| TCGA-55-7728 | 23.47  | 0 |
| TCGA-97-7937 | 18.80  | 0 |
| TCGA-55-8096 | 23.97  | 1 |
| TCGA-55-8514 | 17.33  | 0 |
| TCGA-69-7979 | 2.97   | 0 |
| TCGA-44-6775 | 12.33  | 0 |
| TCGA-55-8511 | 18.40  | 0 |
| TCGA-55-8207 | 32.57  | 0 |
| TCGA-55-8614 | 17.87  | 0 |
| TCGA-55-7724 | 23.50  | 0 |
| TCGA-55-7815 | 25.77  | 0 |
| TCGA-93-8067 | 6.20   | 0 |
| TCGA-44-A47A | 15.53  | 0 |
| TCGA-69-7761 | 6.20   | 0 |
| TCGA-55-8204 | 17.17  | 0 |
| TCGA-MP-A4TE | 29.87  | 1 |
| TCGA-91-A4BC | 1.47   | 0 |
| TCGA-55-A490 | 3.30   | 1 |
| TCGA-55-6978 | 5.87   | 1 |
| TCGA-49-6767 | 22.57  | 0 |
| TCGA-44-7667 | 18.57  | 0 |
| TCGA-95-7039 | 1.13   | 0 |

---

---

|              |        |   |
|--------------|--------|---|
| TCGA-49-AAR9 | 8.67   | 1 |
| TCGA-55-8506 | 0.37   | 0 |
| TCGA-91-7771 | 16.40  | 0 |
| TCGA-J2-8194 | 24.13  | 0 |
| TCGA-55-8619 | 13.87  | 0 |
| TCGA-55-7284 | 8.10   | 1 |
| TCGA-55-8092 | 5.13   | 1 |
| TCGA-69-8453 | 18.33  | 0 |
| TCGA-55-8513 | 26.37  | 0 |
| TCGA-55-7994 | 20.10  | 0 |
| TCGA-44-5644 | 16.60  | 0 |
| TCGA-78-8640 | 217.60 | 0 |
| TCGA-53-7626 | 30.97  | 1 |
| TCGA-50-5055 | 61.00  | 1 |
| TCGA-44-2659 | 17.63  | 0 |
| TCGA-44-7670 | 17.70  | 0 |
| TCGA-NJ-A55O | 0.43   | 0 |
| TCGA-05-5428 | 22.33  | 0 |
| TCGA-86-8074 | 0.80   | 0 |
| TCGA-55-A48X | 22.97  | 0 |
| TCGA-38-4627 | 38.23  | 1 |
| TCGA-86-6851 | 5.97   | 0 |
| TCGA-49-4510 | 29.87  | 1 |
| TCGA-MP-A4SW | 59.27  | 1 |
| TCGA-44-2665 | 13.33  | 0 |
| TCGA-55-1596 | 68.83  | 0 |
| TCGA-67-3776 | 2.03   | 0 |
| TCGA-55-6979 | 7.90   | 1 |
| TCGA-78-7150 | 22.20  | 1 |
| TCGA-55-6975 | 3.93   | 1 |
| TCGA-49-4505 | 14.27  | 1 |
| TCGA-MP-A4SY | 50.03  | 1 |
| TCGA-86-8278 | 15.87  | 0 |
| TCGA-05-5423 | 5.03   | 0 |
| TCGA-05-4427 | 26.37  | 0 |
| TCGA-05-4397 | 24.37  | 1 |
| TCGA-38-4628 | 49.73  | 1 |
| TCGA-73-4668 | 15.57  | 0 |
| TCGA-05-4432 | 25.37  | 0 |
| TCGA-78-7147 | 19.53  | 1 |
| TCGA-49-4506 | 33.30  | 1 |
| TCGA-MP-A4T4 | 87.23  | 1 |
| TCGA-78-8660 | 10.70  | 1 |
| TCGA-62-A46U | 68.90  | 0 |

---



---

|              |       |   |
|--------------|-------|---|
| TCGA-78-7148 | 20.87 | 1 |
| TCGA-55-6984 | 25.33 | 1 |
| TCGA-64-5815 | 7.47  | 0 |
| TCGA-50-5932 | 41.17 | 1 |
| TCGA-55-6982 | 33.17 | 1 |
| TCGA-55-6983 | 94.10 | 0 |
| TCGA-78-7166 | 8.60  | 1 |
| TCGA-73-4676 | 5.47  | 0 |
| TCGA-86-8279 | 16.07 | 0 |
| TCGA-86-8674 | 13.50 | 0 |
| TCGA-86-6562 | 12.53 | 1 |
| TCGA-L9-A743 | 22.13 | 0 |
| TCGA-MN-A4N1 | 27.57 | 0 |
| TCGA-95-A4VN | 18.43 | 0 |
| TCGA-95-8494 | 2.80  | 0 |
| TCGA-L9-A7SV | 18.83 | 0 |
| TCGA-49-6742 | 14.83 | 0 |
| TCGA-86-7711 | 21.00 | 0 |
| TCGA-95-7562 | 2.90  | 1 |
| TCGA-MP-A4TI | 14.30 | 1 |
| TCGA-67-6217 | 14.07 | 0 |
| TCGA-86-8055 | 4.13  | 1 |
| TCGA-95-7567 | 5.43  | 0 |
| TCGA-86-8054 | 24.83 | 0 |
| TCGA-62-A471 | 41.53 | 0 |
| TCGA-05-5425 | 29.40 | 0 |
| TCGA-86-8671 | 27.97 | 0 |
| TCGA-44-A47F | 11.23 | 0 |
| TCGA-73-4675 | 1.33  | 0 |
| TCGA-97-8176 | 15.60 | 1 |
| TCGA-49-4507 | 8.93  | 1 |
| TCGA-05-4250 | 4.03  | 1 |
| TCGA-NJ-A7XG | 20.57 | 0 |
| TCGA-50-5044 | 20.80 | 1 |
| TCGA-05-4396 | 10.10 | 1 |
| TCGA-38-4632 | 45.23 | 1 |
| TCGA-78-7145 | 27.53 | 1 |
| TCGA-78-7156 | 32.53 | 1 |
| TCGA-05-4434 | 15.23 | 1 |
| TCGA-55-8512 | 20.23 | 1 |
| TCGA-55-8620 | 12.50 | 1 |
| TCGA-49-AAQV | 22.57 | 1 |
| TCGA-91-6830 | 2.00  | 0 |
| TCGA-69-8253 | 14.20 | 0 |

---

---

|              |       |   |
|--------------|-------|---|
| TCGA-44-7669 | 19.13 | 1 |
| TCGA-55-7914 | 6.23  | 1 |
| TCGA-L9-A50W | 14.73 | 1 |
| TCGA-91-A4BD | 20.10 | 0 |
| TCGA-44-6779 | 16.67 | 1 |
| TCGA-MP-A4TK | 19.40 | 1 |
| TCGA-50-5068 | 49.97 | 1 |
| TCGA-49-AAR3 | 63.10 | 0 |
| TCGA-55-8508 | 20.57 | 0 |
| TCGA-53-A4EZ | 35.70 | 0 |
| TCGA-49-6744 | 29.67 | 0 |
| TCGA-J2-8192 | 24.63 | 0 |
| TCGA-55-6712 | 5.70  | 1 |
| TCGA-55-7907 | 11.43 | 1 |
| TCGA-69-7978 | 4.47  | 0 |
| TCGA-55-7227 | 31.73 | 1 |
| TCGA-50-6593 | 11.20 | 1 |
| TCGA-55-6981 | 45.97 | 1 |
| TCGA-44-6774 | 12.03 | 0 |
| TCGA-64-1679 | 56.20 | 0 |
| TCGA-MP-A4TC | 2.47  | 1 |
| TCGA-86-7714 | 20.83 | 1 |
| TCGA-50-5051 | 15.93 | 1 |
| TCGA-50-5930 | 9.40  | 1 |
| TCGA-78-7220 | 26.90 | 1 |
| TCGA-62-8398 | 14.80 | 1 |
| TCGA-50-5936 | 8.57  | 1 |
| TCGA-35-5375 | 8.80  | 0 |
| TCGA-64-5779 | 16.90 | 0 |
| TCGA-62-8399 | 89.87 | 0 |
| TCGA-05-4384 | 14.20 | 0 |
| TCGA-73-4659 | 23.70 | 1 |
| TCGA-05-5420 | 15.23 | 0 |
| TCGA-55-1594 | 39.27 | 0 |
| TCGA-MP-A4T8 | 5.37  | 1 |
| TCGA-78-7536 | 8.13  | 1 |
| TCGA-62-A46Y | 13.80 | 1 |
| TCGA-78-7146 | 5.77  | 1 |
| TCGA-MP-A4TD | 10.23 | 1 |
| TCGA-62-8402 | 49.93 | 1 |
| TCGA-44-3396 | 13.70 | 0 |
| TCGA-50-6595 | 6.30  | 1 |
| TCGA-50-5072 | 8.33  | 1 |
| TCGA-64-1677 | 20.93 | 1 |

---

---

|              |       |   |
|--------------|-------|---|
| TCGA-05-4245 | 24.33 | 0 |
| TCGA-NJ-A4YI | 0.13  | 1 |
| TCGA-50-5941 | 18.90 | 0 |
| TCGA-49-6745 | 17.40 | 0 |
| TCGA-97-7554 | 25.83 | 0 |
| TCGA-44-5643 | 13.90 | 0 |
| TCGA-95-A4VP | 20.17 | 0 |
| TCGA-95-A4VK | 21.70 | 0 |
| TCGA-49-4490 | 12.83 | 1 |
| TCGA-86-8359 | 14.80 | 1 |
| TCGA-05-5429 | 9.17  | 1 |
| TCGA-05-4418 | 9.13  | 1 |
| TCGA-99-8025 | 35.33 | 0 |
| TCGA-78-7154 | 19.77 | 1 |
| TCGA-49-4494 | 36.03 | 1 |
| TCGA-50-6594 | 12.33 | 1 |
| TCGA-05-4415 | 3.03  | 1 |
| TCGA-78-7158 | 5.97  | 1 |
| TCGA-62-8394 | 4.63  | 1 |
| TCGA-50-5933 | 79.77 | 1 |
| TCGA-64-1680 | 37.53 | 0 |
| TCGA-78-7160 | 22.60 | 0 |
| TCGA-97-8171 | 18.93 | 0 |
| TCGA-L9-A5IP | 1.93  | 1 |
| TCGA-49-6761 | 11.80 | 0 |
| TCGA-MP-A4T6 | 59.67 | 1 |
| TCGA-49-6743 | 12.30 | 0 |
| TCGA-55-8505 | 14.67 | 0 |
| TCGA-55-7727 | 3.97  | 0 |
| TCGA-86-A4P8 | 14.37 | 0 |
| TCGA-49-AAR4 | 29.30 | 1 |
| TCGA-MP-A4T9 | 42.17 | 1 |
| TCGA-91-6848 | 7.47  | 0 |
| TCGA-55-6970 | 15.47 | 1 |
| TCGA-49-4512 | 30.17 | 1 |
| TCGA-91-6849 | 1.17  | 0 |
| TCGA-69-7974 | 6.13  | 0 |
| TCGA-97-8547 | 21.90 | 0 |
| TCGA-55-8615 | 14.87 | 0 |
| TCGA-55-7283 | 20.30 | 0 |
| TCGA-38-6178 | 14.93 | 0 |

---

Survival status: 0 represent alive, 1 represent dead.
